# Supplementary material for: Substitution of Fossil Coal with Hydrochar from Agricultural Waste in the Electric Arc Furnace Steel Industry: A Comprehensive Life Cycle Analysis
Source: MDPI journal article supplement (doi:10.3390/en16155686), 2023-07-28
Supplement: s1 [file s1]

Archive with 1 entries (1 files):
- energies-2495260-supplementary.pdf
